# Supplementary material
Source: Springer Nature journal article supplement (https://www.springermedizin.de/resource/supplementary/13012_2009_431_MOESM1_ESM.pdf/9629750)
Supplement: MOESM1 [file 9629750]

10 VA Primary Care Practices Randomized

7 CCM Practices  
14,862 Patient Telephone Numbers Collected

3 Non-CCM Practices  
13,612 Patient Telephone Numbers Collected

- 5,013 Sampling criteria met: Telephone numbers not used
- 699 Unreachable: Maximum call attempts
- 3,154 Refused
- 669 Ineligible\*

- 3,080 Sampling criteria met: Telephone numbers not used
- 645 Unreachable: Maximum call attempts
- 3,485 Refused
- 800 Ineligible\*

5,327 Patients screened for depression

5,602 Patients screened for depression

689 Patients eligible: PHQ-9  $\geq 10$

624 Patients eligible: PHQ-9  $\geq 10$

- 288 Refused enrollment after taking PHQ-9
- 15 Acutely Suicidal

- 235 Refused enrollment after taking PHQ-9
- 14 Acutely Suicidal

386 Completed Baseline Survey

375 Completed Baseline Survey

- 32 Non-working/wrong telephone numbers
- 19 Unreachable: Maximum call attempts
- 4 Deceased
- 7 Too ill
- 36 Refused 7 Month Survey

- 40 Non-working/wrong telephone numbers
- 29 Unreachable: Maximum call attempts
- 6 Deceased
- 7 Too ill
- 35 Refused 7 Month Survey

288 Complete PAQ-7 Month Survey

258 Complete PAQ-7 Month Survey

- 20 Did not give consent to use administrative data

- 20 Did not give consent to use administrative data

268 Complete PAQ-7 Month Survey and had Administrative Data

238 Complete PAQ-7 Month Survey and had Administrative Data

\*Ineligible at baseline refers to those who were deceased, too ill, institutionalized, or had cognitive, language or hearing problems
